# Supplementary material for: Trimester-specific associations of maternal dietary patterns with preterm birth: China Medical University birth cohort study
Source: Royal Society of Chemistry journal article supplement (doi:10.1039/d3fo00691c), 2023-01-01
Supplement: d3fo00691c2.pdf [file d3fo00691c2.pdf]

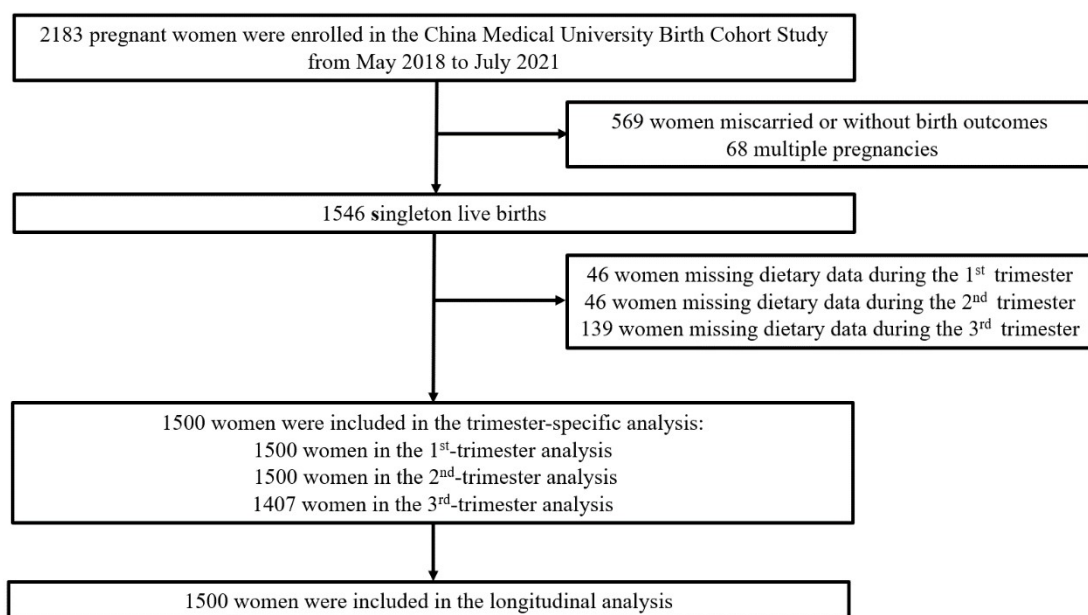

**Figure S1.** Flow chart of the study

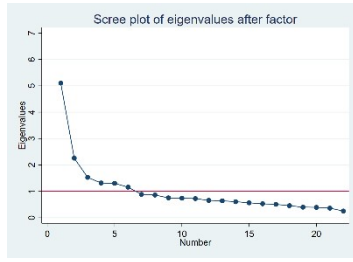

a

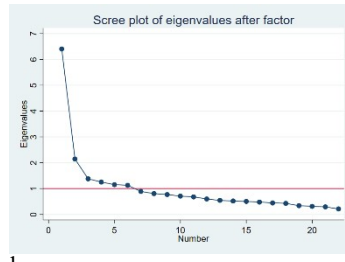

b

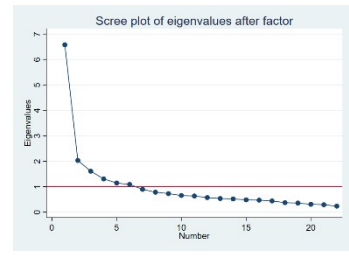

c

**Figure S2.** Scree plot from principal components analysis, a: 1<sup>st</sup> trimester; b: 2<sup>nd</sup> trimester; c:

3<sup>rd</sup> trimester

**Table S1. Characteristics of participants included and excluded in the present study.**

| Characteristics                                                             | Participants, n (%) or mean±SD |                   | P-value |
|-----------------------------------------------------------------------------|--------------------------------|-------------------|---------|
|                                                                             | Included<br>n=1500             | Excluded<br>n=683 |         |
| Age at enrollment, years                                                    |                                |                   | 0.78    |
| ≤ 35                                                                        | 1174 (79.1)                    | 506 (78.6)        |         |
| > 35                                                                        | 303 (20.9)                     | 138 (21.4)        |         |
| Ethnicity                                                                   |                                |                   | 0.95    |
| Chinese Han                                                                 | 1239 (92.5)                    | 539 (92.6)        |         |
| Others                                                                      | 100 (7.5)                      | 43 (7.4)          |         |
| Educational attainment                                                      |                                |                   | <0.001  |
| High school or below                                                        | 182 (12.2)                     | 120 (18.1)        |         |
| College or above                                                            | 1308 (87.8)                    | 543 (81.9)        |         |
| Household income per year, CNY                                              |                                |                   | 0.92    |
| <50,000                                                                     | 517 (40.2)                     | 232 (40.3)        |         |
| ≥50,000                                                                     | 775 (60.0)                     | 344 (59.7)        |         |
| Parity                                                                      |                                |                   | 0.07    |
| Primipara                                                                   | 605 (65.5)                     | 317 (70.4)        |         |
| Multipara                                                                   | 319 (34.5)                     | 133 (29.6)        |         |
| Smoking status                                                              |                                |                   | <0.001  |
| No                                                                          | 1450 (97.8)                    | 629 (94.9)        |         |
| Yes                                                                         | 33 (2.2)                       | 34 (5.1)          |         |
| Pre-pregnancy BMI category                                                  |                                |                   | 0.33    |
| <18.5, kg/m <sup>2</sup>                                                    | 191 (12.9)                     | 85 (12.9)         |         |
| 18.5-<24.0, kg/m <sup>2</sup>                                               | 857 (57.8)                     | 362 (54.8)        |         |
| ≥24.0, kg/m <sup>2</sup>                                                    | 434 (29.3)                     | 214 (32.4)        |         |
| Physical activity status during 1 <sup>st</sup> trimester,<br>MET-hour/week | 135.9±79.1                     | 133.1±80.4        | 0.45    |
| Physical activity status during 2 <sup>nd</sup> trimester,<br>MET-hour/week | 130.2±78.4                     | 120.7±77.3        | 0.02    |
| Physical activity status during 3 <sup>rd</sup> trimester,<br>MET-hour/week | 113.1±70.6                     | 102.1±74.2        | 0.01    |
| Daily calorie intake during 1 <sup>st</sup> trimester <sup>a</sup>          |                                |                   | 0.98    |
| <1800 kcal/d                                                                | 772 (51.5)                     | 352 (51.5)        |         |
| ≥1800 kcal/d                                                                | 728 (48.5)                     | 331 (48.5)        |         |
| Daily calorie intake during 2 <sup>nd</sup> trimester <sup>a</sup>          |                                |                   | <0.001  |
| <2100 kcal/d                                                                | 876 (58.4)                     | 487 (71.3)        |         |
| ≥2100 kcal/d                                                                | 624 (41.6)                     | 196 (28.7)        |         |
| Daily calorie intake during 3 <sup>rd</sup> trimester <sup>a</sup>          |                                |                   | 0.34    |
| <2250 kcal/d                                                                | 930 (66.1)                     | 261 (51.1)        |         |
| ≥2250 kcal/d                                                                | 477 (33.9)                     | 67 (18.9)         |         |
| Child sex                                                                   |                                |                   | 0.31    |
| Male                                                                        | 768 (51.7)                     | 77 (56.2)         |         |

Female

717 (48.3)

60 (43.8)

---

CNY: China yuan (1 China yuan = 0.15 US dollar); BMI: body mass index; MET: metabolic equivalent.

<sup>a</sup> Pregnant women's daily calorie intake was categorized according to the recommend calorie intake for women in different trimesters by dietary guidelines for Chinese residents

**Table S2. Participants' daily energy and nutrients intake according to dietary pattern scores, in tertiles, among the 1500 participants in China Medical University Birth Cohort Study**

| Dietary patterns                | Total calorie intake (kcal/d), mean±SD | Carbohydrate intake (g/d), mean±SD | Protein intake (g/d), mean±SD | Fat intake (g/d), mean±SD |
|---------------------------------|----------------------------------------|------------------------------------|-------------------------------|---------------------------|
| <b>1<sup>st</sup> trimester</b> |                                        |                                    |                               |                           |
| □                               |                                        |                                    |                               |                           |
| Fish-seafood pattern            |                                        |                                    |                               |                           |
| Tertile 1                       | 1329.3 ± 516.4                         | 229.8±99.1                         | 45.9±15.6                     | 36.6±18.4                 |
| Tertile 2                       | 1813.2 ± 544.0                         | 277.6±100.0                        | 70.6±16.2                     | 61.5±21.6                 |
| Tertile 3                       | 2426.0 ± 936.5                         | 336.1±131.5                        | 108.8±51.1                    | 90.1±43.4                 |
| <i>P</i>                        | <0.001                                 | <0.001                             | <0.001                        | <0.001                    |
| Dairy-egg pattern               |                                        |                                    |                               |                           |
| Tertile 1                       | 1305.0±541.8                           | 225.3±105.3                        | 47.4±18.1                     | 36.2±18.3                 |
| Tertile 2                       | 1780.7±502.9                           | 274.1±97.1                         | 70.5±18.4                     | 58.9±19.9                 |
| Tertile 3                       | 2482.4±890.6                           | 344.0±123.0                        | 107.3±51.2                    | 93.1±41.8                 |
| <i>P</i>                        | <0.001                                 | <0.001                             | <0.001                        | <0.001                    |
| Fruit-vegetable pattern         |                                        |                                    |                               |                           |
| Tertile 1                       | 1308.9±600.9                           | 192.7±86.5                         | 56.3±34.7                     | 45.6±27.2                 |
| Tertile 2                       | 1897.1±675.1                           | 287.8±90.9                         | 77.7±38.1                     | 63.6±32.9                 |
| Tertile 3                       | 2362.3±818.3                           | 362.9±111.8                        | 91.2±43.0                     | 78.9±41.7                 |
| <i>P</i>                        | <0.001                                 | <0.001                             | <0.001                        | <0.001                    |
| <b>2<sup>nd</sup> trimester</b> |                                        |                                    |                               |                           |
| Fish-seafood pattern            |                                        |                                    |                               |                           |
| Tertile 1                       | 1429.6±502.4                           | 225.7±92.3                         | 53.3±16.1                     | 45.9±19.9                 |
| Tertile 2                       | 2023.5±585.3                           | 297.0±106.9                        | 81.6±18.3                     | 71.5±23.9                 |
| Tertile 3                       | 2753.0±1214.6                          | 365.8±157.7                        | 128.1±67.4                    | 105.1±53.1                |
| <i>P</i>                        | <0.001                                 | <0.001                             | <0.001                        | <0.001                    |
| Meat-staple pattern             |                                        |                                    |                               |                           |
| Tertile 1                       | 1333.8±456.0                           | 206.1±85.5                         | 52.0±15.5                     | 43.4±17.4                 |
| Tertile 2                       | 1939.1±410.8                           | 285.5±85.8                         | 78.9±12.9                     | 67.7±17.6                 |
| Tertile 3                       | 2933.2±1124.7                          | 396.9±146.9                        | 132.1±65.3                    | 111.5±50.6                |
| <i>P</i>                        | <0.001                                 | <0.001                             | <0.001                        | <0.001                    |
| Dairy-egg pattern               |                                        |                                    |                               |                           |
| Tertile 1                       | 1420.1±525.3                           | 225.2±98.9                         | 54.4±17.9                     | 44.2±19.5                 |
| Tertile 2                       | 1964.8±518.9                           | 288.7±98.2                         | 80.8±19.0                     | 68.8±19.3                 |
| Tertile 3                       | 2819.5±1184.3                          | 374.5±155.4                        | 127.7±67.5                    | 109.5±51.1                |
| <i>P</i>                        | <0.001                                 | <0.001                             | <0.001                        | <0.001                    |
| <b>3<sup>rd</sup> trimester</b> |                                        |                                    |                               |                           |
| Fish-seafood pattern            |                                        |                                    |                               |                           |
| Tertile 1                       | 1461.8±512.3                           | 230.8±93.3                         | 54.4±16.2                     | 46.8±19.5                 |
| Tertile 2                       | 1960.6±566.4                           | 285.9±106.7                        | 80.4±16.9                     | 69.6±21.7                 |
| Tertile 3                       | 2789.4±1229.6                          | 369.6±163.4                        | 129.6±67.4                    | 107.0±53.9                |
| <i>P</i>                        | <0.001                                 | <0.001                             | <0.001                        | <0.001                    |
| Meat-staple pattern             |                                        |                                    |                               |                           |

|                   |               |             |            |            |
|-------------------|---------------|-------------|------------|------------|
| Tertile 1         | 1324.9±421.8  | 201.1±77.3  | 52.7±14.9  | 43.8±16.9  |
| Tertile 2         | 1925.0±398.0  | 283.3±86.9  | 78.8±13.1  | 67.3±16.1  |
| Tertile 3         | 2960.2±1135.5 | 401.7±150.5 | 132.7±65.5 | 112.2±51.4 |
| <i>P</i>          | <0.001        | <0.001      | <0.001     | <0.001     |
| Dairy-egg pattern |               |             |            |            |
| Tertile 1         | 1423.9±518.0  | 225.6±97.6  | 54.8±17.4  | 44.8±18.9  |
| Tertile 2         | 1961.4±533.7  | 285.0±101.7 | 80.7±17.7  | 69.2±19.9  |
| Tertile 3         | 2825.3±1201.0 | 375.6±158.9 | 128.7±67.7 | 109.3±52.2 |
| <i>P</i>          | <0.001        | <0.001      | <0.001     | <0.001     |

---

**Table S3. Trimester-specific associations of the two common dietary patterns with odds of preterm**

**birth, stratified by women's pre-pregnancy weight status**

| Dietary patterns                                                     | Tertile 1<br>Reference | Tertile 2<br>OR (95% CI) | Tertile 3<br>OR (95% CI) | <i>P</i> for<br>interaction |
|----------------------------------------------------------------------|------------------------|--------------------------|--------------------------|-----------------------------|
| <b>Fish-seafood pattern in 1<sup>st</sup> trimester <sup>a</sup></b> |                        | □                        | □                        | □                           |
| Subgroups analysis by pre-pregnancy                                  |                        |                          |                          |                             |
| BMI categorizes                                                      |                        |                          |                          | 0.254                       |
| <18.5, kg/m <sup>2</sup>                                             | 1.00                   | 7.56(1.93, 29.70)        | 4.88 (0.99, 24.18)       |                             |
| 18.5-<24.0, kg/m <sup>2</sup>                                        | 1.00                   | 2.16 (1.11, 4.20)        | 2.26 (1.02, 5.01)        |                             |
| ≥24.0, kg/m <sup>2</sup>                                             | 1.00                   | 1.33 (0.58, 3.04)        | 1.48 (0.58, 3.79)        |                             |
| <b>Fish-seafood pattern in 2<sup>nd</sup> trimester <sup>b</sup></b> |                        |                          |                          |                             |
| Subgroups analysis by pre-pregnancy                                  |                        |                          |                          |                             |
| BMI categorizes                                                      |                        |                          |                          | 0.092                       |
| <18.5, kg/m <sup>2</sup>                                             | 1.00                   | 0.65 (0.13, 3.21)        | 0.84 (0.10, 7.08)        |                             |
| 18.5-<24.0, kg/m <sup>2</sup>                                        | 1.00                   | 0.50 (0.23, 1.06)        | 0.48 (0.19, 1.22)        |                             |
| ≥24.0, kg/m <sup>2</sup>                                             | 1.00                   | 0.57 (0.24, 1.37)        | 0.27 (0.09, 0.83)        |                             |
| <b>Fish-seafood pattern in 3<sup>rd</sup> trimester <sup>b</sup></b> |                        |                          |                          |                             |
| Subgroups analysis                                                   |                        |                          |                          |                             |
| Pre-pregnancy BMI categorizes                                        |                        |                          |                          | 0.648                       |
| <18.5, kg/m <sup>2</sup>                                             | 1.00                   | 0.69 (0.09, 5.41)        | 0.87 (0.07, 11.46)       |                             |
| 18.5-<24.0, kg/m <sup>2</sup>                                        | 1.00                   | 0.88 (0.38, 2.04)        | 0.60 (0.20, 1.83)        |                             |
| ≥24.0, kg/m <sup>2</sup>                                             | 1.00                   | 1.13 (0.38, 3.33)        | 1.96 (0.52, 7.39)        |                             |
| <b>Dairy-egg pattern in 1<sup>st</sup> trimester <sup>a</sup></b>    |                        | □                        | □                        | □                           |
| Subgroups analysis by pre-pregnancy                                  |                        |                          |                          |                             |
| BMI categorizes                                                      |                        |                          |                          | 0.046                       |
| <18.5, kg/m <sup>2</sup>                                             | 1.00                   | 0.20 (0.05, 0.78)        | 0.10 (0.02, 0.54)        |                             |
| 18.5-<24.0, kg/m <sup>2</sup>                                        | 1.00                   | 0.64 (0.33, 1.25)        | 0.87 (0.41, 1.83)        |                             |
| ≥24.0, kg/m <sup>2</sup>                                             | 1.00                   | 1.04 (0.37, 2.13)        | 1.10 (0.43, 2.81)        |                             |
| <b>Dairy-egg pattern in 2<sup>nd</sup> trimester <sup>b</sup></b>    |                        |                          |                          |                             |
| Subgroups analysis by pre-pregnancy                                  |                        |                          |                          |                             |
| BMI categorizes                                                      |                        |                          |                          | 0.046                       |
| <18.5, kg/m <sup>2</sup>                                             | 1.00                   | 1.74 (0.45, 6.77)        | 0.82 (0.14, 4.82)        |                             |
| 18.5-<24.0, kg/m <sup>2</sup>                                        | 1.00                   | 1.50 (0.73, 3.06)        | 2.02 (0.85, 4.81)        |                             |
| ≥24.0, kg/m <sup>2</sup>                                             | 1.00                   | 1.34 (0.57, 3.12)        | 3.16(1.15, 8.66)         |                             |
| <b>Dairy-egg pattern in 3<sup>rd</sup> trimester <sup>b</sup></b>    |                        |                          |                          |                             |
| Subgroups analysis                                                   |                        |                          |                          |                             |
| Pre-pregnancy BMI categorizes                                        |                        |                          |                          | 0.543                       |
| <18.5, kg/m <sup>2</sup>                                             | 1.00                   | 5.30 (0.70, 40.39)       | 5.71 (0.51, 40.39)       |                             |
| 18.5-<24.0, kg/m <sup>2</sup>                                        | 1.00                   | 2.27 (0.92, 5.62)        | 2.50 (0.80, 7.81)        |                             |
| ≥24.0, kg/m <sup>2</sup>                                             | 1.00                   | 1.72 (0.61, 4.89)        | 2.57 (0.78, 8.48)        |                             |

<sup>a</sup> Adjusted for age, ethnicity, education attainment, household income, parity, physical activity status, daily

---

calorie intake, child sex and other dietary pattern scores during the same trimester

<sup>b</sup> Adjusted for age, ethnicity, education attainment, household income, parity, physical activity status, daily calorie intake, child sex, other dietary pattern scores during the same trimester and dietary pattern scores in the previous trimester

OR: odds ratio; CI: confidence interval; BMI: body mass index
